# Supplementary material for: Diastereomeric salts of (S,S)-sertraline withl- andd-tartaric acids: an investigation into chiral supramolecular discrimination
Source: Royal Society of Chemistry journal article supplement (doi:10.1039/d3ce00094j), 2023-01-01

## SUPPORTING INFORMATION

### Diastereomeric salts of (S,S)-Sertraline with L- and D-tartaric acids: an investigation into chiral supramolecular discrimination.

Paulo S. Carvalho Jr<sup>a\*</sup>, Luan F. Diniz<sup>b</sup>, Alejandro P. Ayala<sup>c</sup>.

<sup>a</sup> Institute of Physics, Federal University of Mato Grosso do Sul, 79070-900, Campo Grande, MS, Brazil. \*e-mail: [paulo.sousa@ufms.br](mailto:paulo.sousa@ufms.br). <sup>b</sup>Laboratório de Controle de Qualidade, Departamento de Produtos Farmacêuticos, Faculdade de Farmácia, Universidade Federal de Minas Gerais, 31270-901, Belo Horizonte, MG, Brazil. <sup>c</sup> Departamento de Física, Universidade Federal do Ceará, 60455-970, Fortaleza, Ceará, Brazil.

### COMPLEMENTARY FIGURES AND TABLES

**Figure S1.** Authenticity evaluation of the salt samples synthesized: (a) DSC curves of diastereomeric salts of Srt, prepared by the different methods; for comparison, DSC curves of sertraline hydrochloride and tartaric acid (starting materials) were included. (b) PXRD patterns of diastereomeric salts of Srt, produced by the different methods; for comparison, diffractograms calculated of each salt as well as of sertraline hydrochloride and tartaric acid (starting materials) were included.

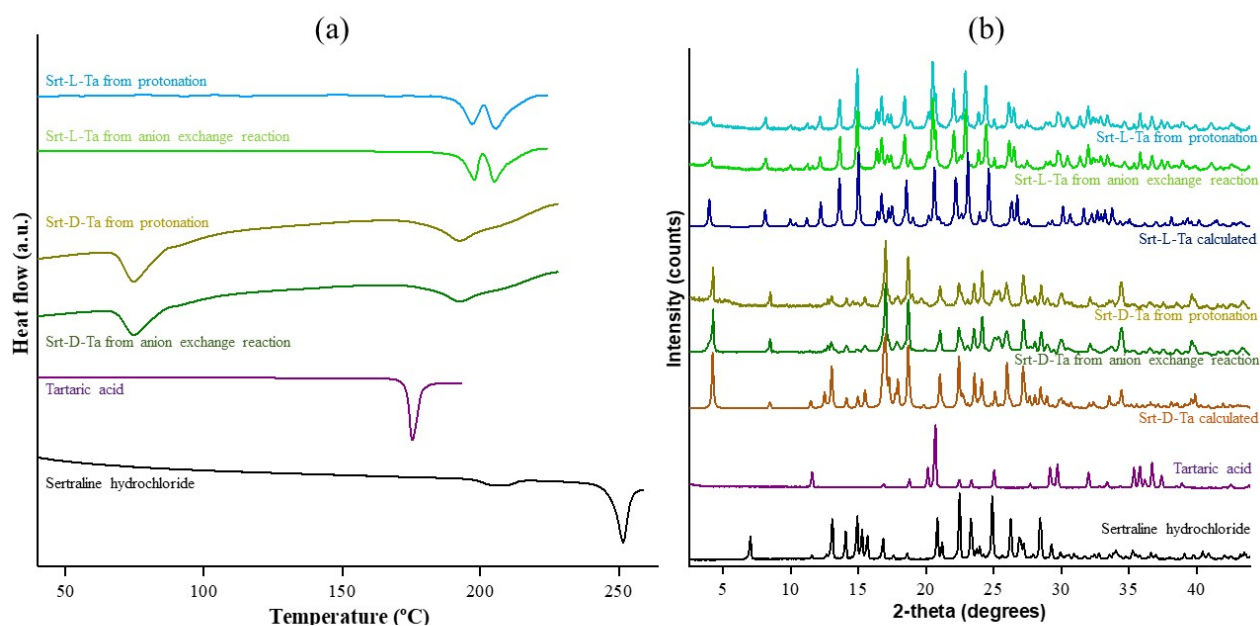

**Figure S2.** Crystal habits of the diastereomeric salts of Srt: (a) Srt-L-Ta and (b) Srt-D-Ta.

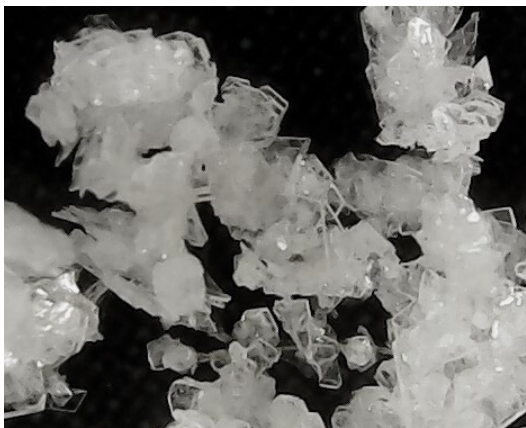

**(a)**

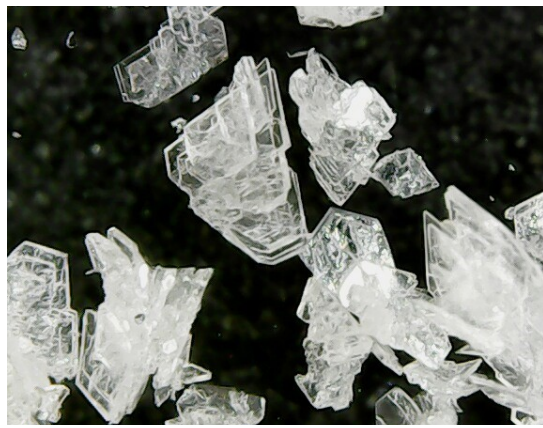

**(b)**

**Figure S3.** Overlay Srt<sup>+</sup> conformation from hydrochloride salts and the diastereomeric tartrate ones.

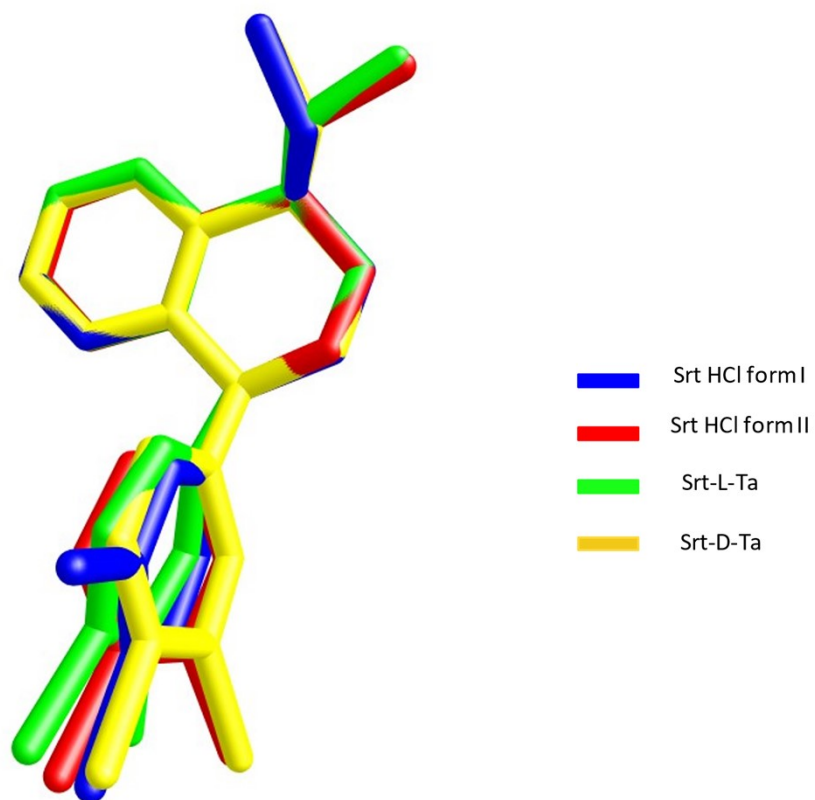

**Figure S4.** Diagram of cation-anion association in the diastereomeric Srt salts.

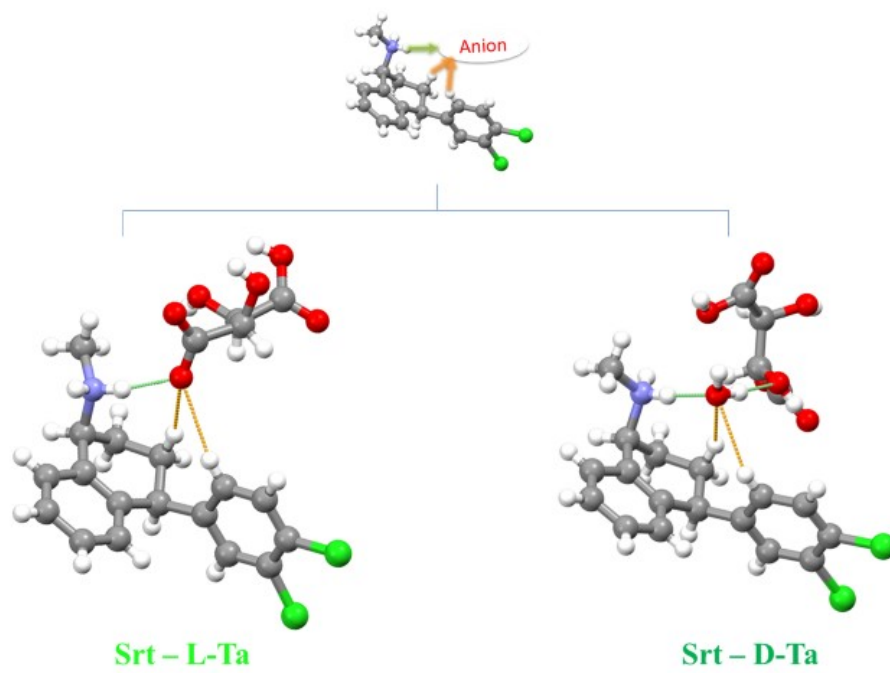

**Figure S5.** The CH $\cdots\pi$  interaction between the aromatic moieties of Srt<sup>+</sup> cations in the cationic chains in the Srt-L-Ta structure.

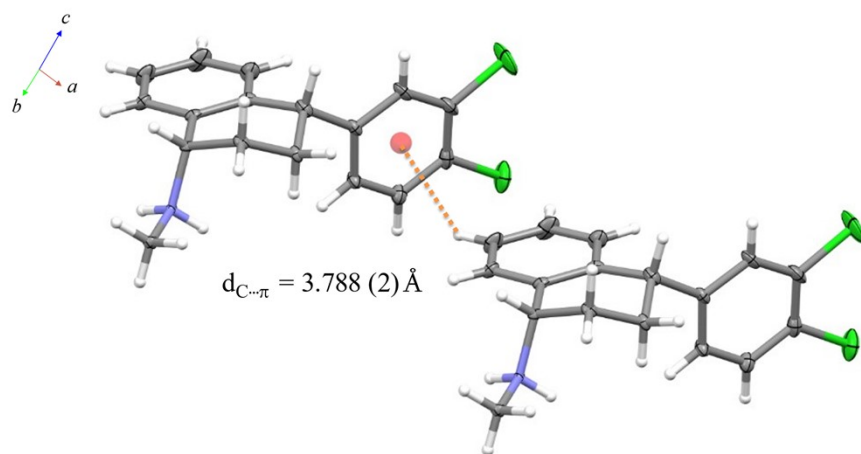

**Figure S6.** Perspective view of the cation-H<sub>2</sub>O-anion assembly in the Srt-D-Ta structure.

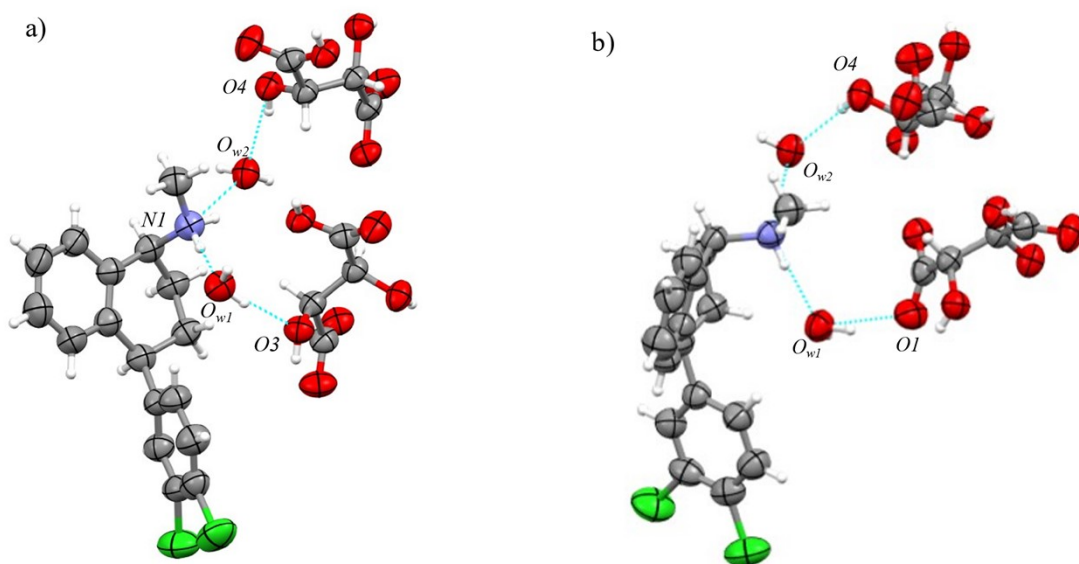

**Figure S7.** The intermolecular contact contribution for the Hirshfeld surface of (a)  $\text{Srt}^+$  cation and (b) anions from the diastereomeric salts.

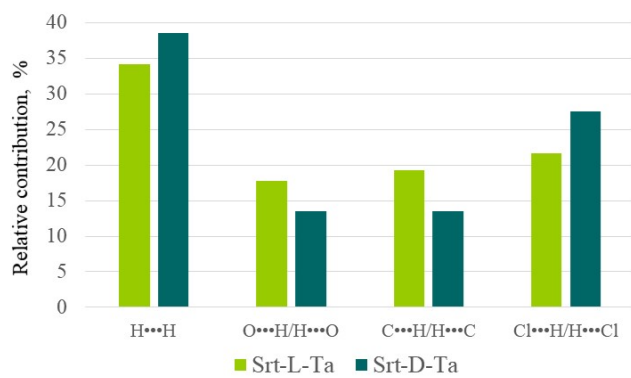

**(a)**

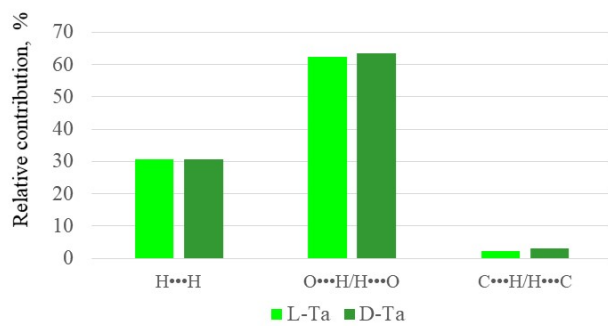

**(b)**

**Figure S8.** PXRD data of the solid residues from the equilibrium solubility studies for (a) Srt-L-Ta and (b) Srt-D-Ta. For comparison, the experimental diffractograms of freshly prepared samples of each salt have been included.

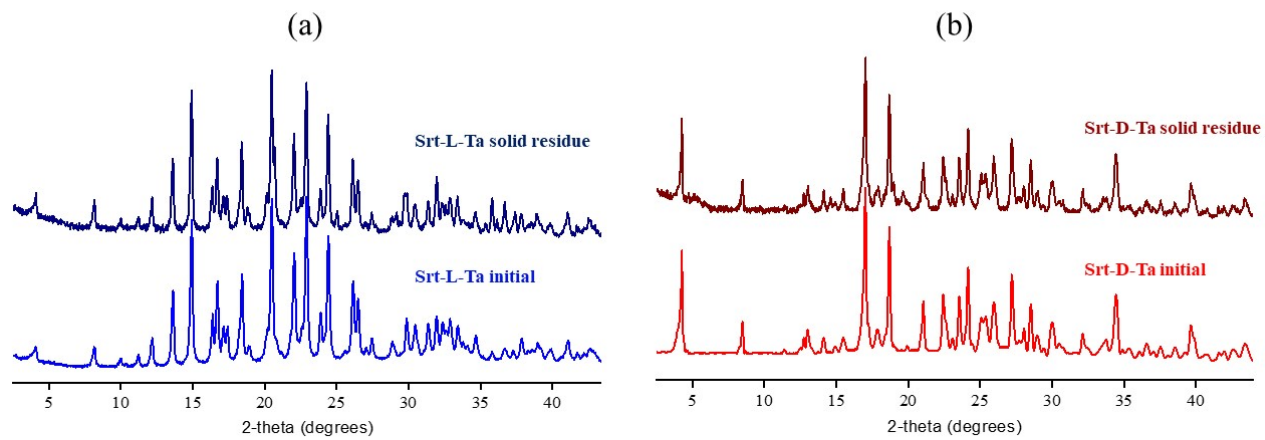

Supplement: d3ce00094j1.pdf [file d3ce00094j1.pdf]
